# Supplementary material for: Analysis of eye movements to study drawing in the context of vector fields
Source: Frontiers journal article supplement (doi:10.3389/feduc.2023.1162281), 2023-06-22
Supplement: Data_Sheet_1.pdf [file Data_Sheet_1.pdf]

## ***Supplementary Material***

The supplementary material includes the study material in original language (German). For an English translation please see Fig. 3 and 4 in the article. Further materials will be provided on request.

### **Original study material:**

S1 Pre-exercise on vector components and partial derivatives

S2 Divergence instruction

## ORIGINAL STUDY MATERIAL

### Vektoren und partielle Ableitungen

Ein Vektorfeld  $\vec{F}$  ist eine Abbildung, die jedem Raumpunkt  $(x, y)$  einen Vektor  $\vec{F}(x, y)$  zuordnet. Die Vektoren werden mithilfe der Komponenten  $F_x$  und  $F_y$  bzgl. der Koordinaten  $x$  und  $y$  dargestellt, wobei die positive  $x$ -Achse im Folgenden in horizontaler Richtung nach rechts und die positive  $y$ -Achse in vertikaler Richtung nach oben orientiert ist.

1. Betrachten Sie den folgenden Vektor und skizzieren Sie seine Zerlegung in die Komponenten  $F_x$  und  $F_y$ .

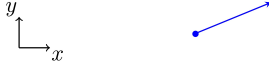

Welche der folgenden Aussagen trifft zu? Markieren Sie!

- ☐  $x$ - und  $y$ -Komponente sind gleich groß.  
☐ Die  $x$ -Komponente ist größer als die  $y$ -Komponente.  
☐ Die  $y$ -Komponente ist größer als die  $x$ -Komponente.

2. Zeichnen Sie nun für jeden Vektor der nachfolgenden oberen Vektorzeile die Zerlegung in die Komponenten  $F_x$  und  $F_y$  ein. Skizzieren Sie anschließend die jeweilige  $y$ -Komponente der Vektoren in der zweiten Zeile ( $F_y$ ) und die jeweilige  $x$ -Komponente in der dritten Zeile ( $F_x$ ). Nutzen Sie die Gitterpunkte als Startmarkierungen für die Vektorpfeile.

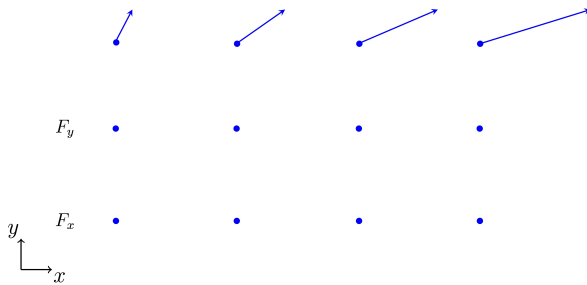

Welche der folgenden Aussagen trifft zu? Markieren Sie alle richtigen Aussagen.

- ☐  $F_y$  nimmt in  $x$ -Richtung zu.  
☐  $F_y$  nimmt in  $x$ -Richtung ab.  
☐  $F_y$  ist konstant.  
☐  $F_x$  ist konstant.  
☐  $F_x$  nimmt in  $x$ -Richtung ab.  
☐  $F_x$  nimmt in  $x$ -Richtung zu.

Bitte umblättern.

3. Zeichnen Sie in der nachfolgenden linken Vektorspalte für jeden Vektor die Vektorkomponentenzerlegung ein. Skizzieren Sie anschließend jeweils die  $x$ -Komponente der Vektoren in der mittleren Spalte ( $F_x$ ) und die jeweilige  $y$ -Komponente in der rechten Spalte ( $F_y$ ). Nutzen Sie die Gitterpunkte als Startmarkierungen für die Vektorpfeile.

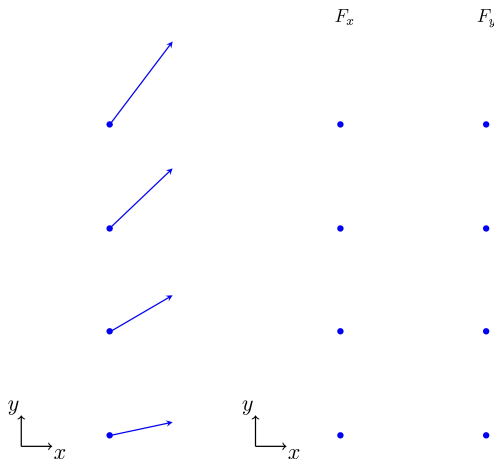

Welche der folgenden Aussagen trifft zu? Markieren Sie alle richtigen Aussagen.

- ☐  $F_y$  nimmt in  $y$ -Richtung zu.  
☐  $F_y$  ist konstant.  
☐  $F_y$  nimmt in  $y$ -Richtung ab.  
☐  $F_x$  ist konstant.  
☐  $F_x$  nimmt in  $y$ -Richtung ab.  
☐  $F_x$  nimmt in  $y$ -Richtung zu.

Die Änderung der Feldvektoren in  $x$ -Richtung (entlang einer Zeile) oder in  $y$ -Richtung (entlang einer Spalte) wird mithilfe der partiellen Ableitungen  $\frac{\partial F_x}{\partial x}$  der  $F_x$ -Komponente nach  $x$  bzw.  $\frac{\partial F_y}{\partial y}$  der  $F_y$ -Komponente nach  $y$  beschrieben. Es gilt  $\frac{\partial F_x}{\partial x} > 0$ , wenn  $F_x$  in positiver  $x$ -Richtung zunimmt und  $\frac{\partial F_x}{\partial x} < 0$ , wenn  $F_x$  in positiver  $x$ -Richtung abnimmt (analog für die partielle Ableitung nach  $y$ ).

Bitte umblättern.

Figure S1: Two-sided pre-exercise on vector components and partial derivatives with drawing activities (treatment group) in original language (German). In the exercise without drawing activities, the decomposition tasks (left page side) are to be completed without drawing vectors (control group).

### Interpretation der Divergenz

Die Divergenz eines Vektorfeldes ( $\operatorname{div} \vec{F} = \nabla \cdot \vec{F}$ ) an einem Ort  $(x, y)$  ergibt sich über die Summe der partiellen Ableitungen

$$\operatorname{div} \vec{F}(x, y) = \frac{\partial F_x}{\partial x} + \frac{\partial F_y}{\partial y}.$$

Interpretieren Sie diese Gleichung anschaulich am Beispiel des folgenden Vektorfeldes, indem Sie wie folgt vorgehen:

- Wählen Sie einen beliebigen Vektor im Feld aus. Zerlegen Sie diesen Vektor gedanklich in eine  $x$ - und eine  $y$ -Komponente.
- Untersuchen Sie, ob sich die  $x$ -Komponente des Vektorfeldes in  $x$ -Richtung (entlang einer Zeile) ändert. Dies entspricht dem ersten Summanden in obiger Gleichung.
- Untersuchen Sie auch, ob sich die  $y$ -Komponente des Vektorfeldes in  $y$ -Richtung (entlang einer Spalte) ändert. Dies entspricht dem zweiten Summanden in der Gleichung.
- Sollte sich weder  $F_x$  in  $x$ -Richtung noch  $F_y$  in  $y$ -Richtung ändern, so ist das Feld quelfrei. Zu diesem Ergebnis sollten Sie hier gekommen sein. Ändert sich eine der beiden Komponenten, ist das Feld nicht quelfrei. Den Fall, dass sich die Veränderungen in  $x$ - und in  $y$ -Richtung gerade aufheben, betrachten wir nicht.
- Bei allen hier verwendeten Vektorfeldern ist die Divergenz räumlich konstant. Um dies zu überprüfen, wählen Sie einen zweiten beliebigen Vektor und führen Sie das beschriebene Vorgehen erneut durch. Auch hier sollten Sie zu dem Ergebnis kommen, dass es sich um ein quelfreies Vektorfeld handelt.

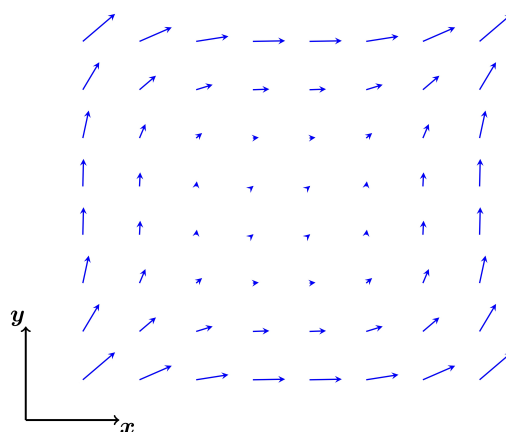

**Hinweis:** Streng genommen bedeuten partielle Ableitungen infinitesimale Änderungen. Da die Divergenz der Vektorfelder hier aber konstant Null oder nicht-Null ist, können wir Vektoren miteinander vergleichen, die nicht infinitesimal neben- bzw. übereinander liegen.

Figure S2: Instruction on visually interpreting divergence of vector fields with drawing activities (treatment group) in original language (German). The explanatory text aims at drawing vector components into the adjacent vector field diagram in order to infer the fields' divergence. In the instruction without drawing activities, the explanatory text asks for a mental decomposition of the vectors (control group).
